# Supplementary material
Source: publisher figshare collection journal article supplement (https://springernature.figshare.com/ndownloader/files/18094607)

**(a)** Peak Region Size As Function of Driver Frequency  
(n = 500 samples)

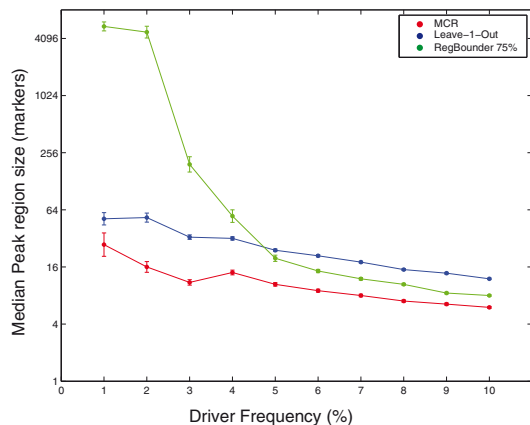

**(b)** Peak Region Size As Function of Sample Size  
(5% Driver Frequency)

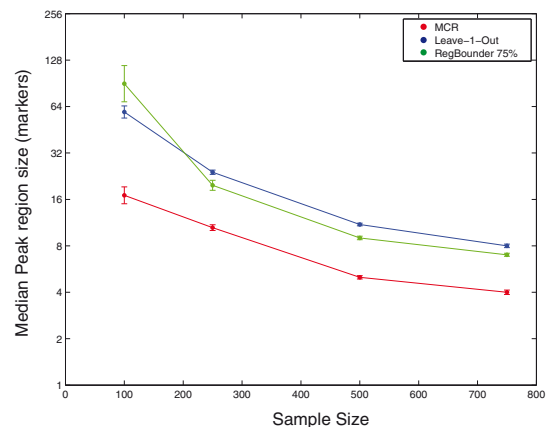

**(c)** RegBoulder vs. Theoretically Optimal Peak Region  
(n = 500 samples)

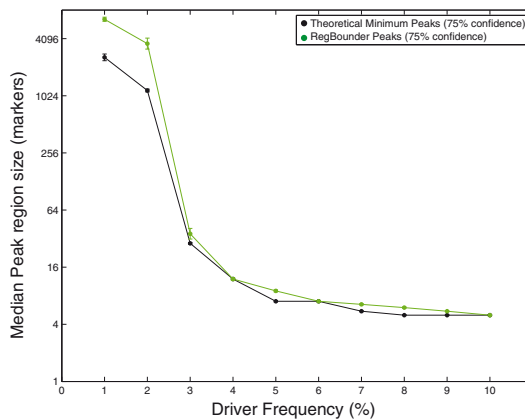

Supplement: Supplementary file 1 [file 18094607]
